# Supplementary material for: Cholesterol induces lipoprotein lipase expression in a tree shrew (Tupaia belangeri chinensis) model of non-alcoholic fatty liver disease
Source: PubMed Central journal article supplement (PMC4629153; doi:10.1038/srep15970), 2015-11-02
Supplement: srep15970-s1.pdf [file srep15970-s1.pdf]

1 **Cholesterol induces lipoprotein lipase expression in a tree shrew (*Tupaia***

2 ***belangeri chinensis*) model of non-alcoholic fatty liver disease**

3 Linqiang Zhang<sup>1,2\*</sup>, Zhiguo Zhang<sup>1,2\*</sup>, Yunhai Li<sup>1\*</sup>, Shasha Liao<sup>1,3</sup>, Xiaoyun Wu<sup>1</sup>, Qing

4 Chang<sup>1</sup>, Bin Liang<sup>1#</sup>

5 1, Key Laboratory of Animal Models and Human Disease Mechanisms of Chinese  
6 Academy of Science & Yunnan province, Kunming Institute of Zoology, Chinese  
7 Academy of Sciences, Kunming, Yunnan 650223, China

8 2, Kunming College of Life Science, University of Chinese Academy of Sciences,  
9 Kunming, Yunnan 650204, China

10 3, School of Life Sciences, Anhui University, Hefei, Anhui 230601, China.

11  
12 \*: Equal contribution

13 #: Correspondence should be addressed to

14 Bin Liang

15 Tel: 086-871-65181927

16 E-mail: [liangb@mail.kiz.ac.cn](mailto:liangb@mail.kiz.ac.cn)

17

18

19 **Supplementary figures and legends**

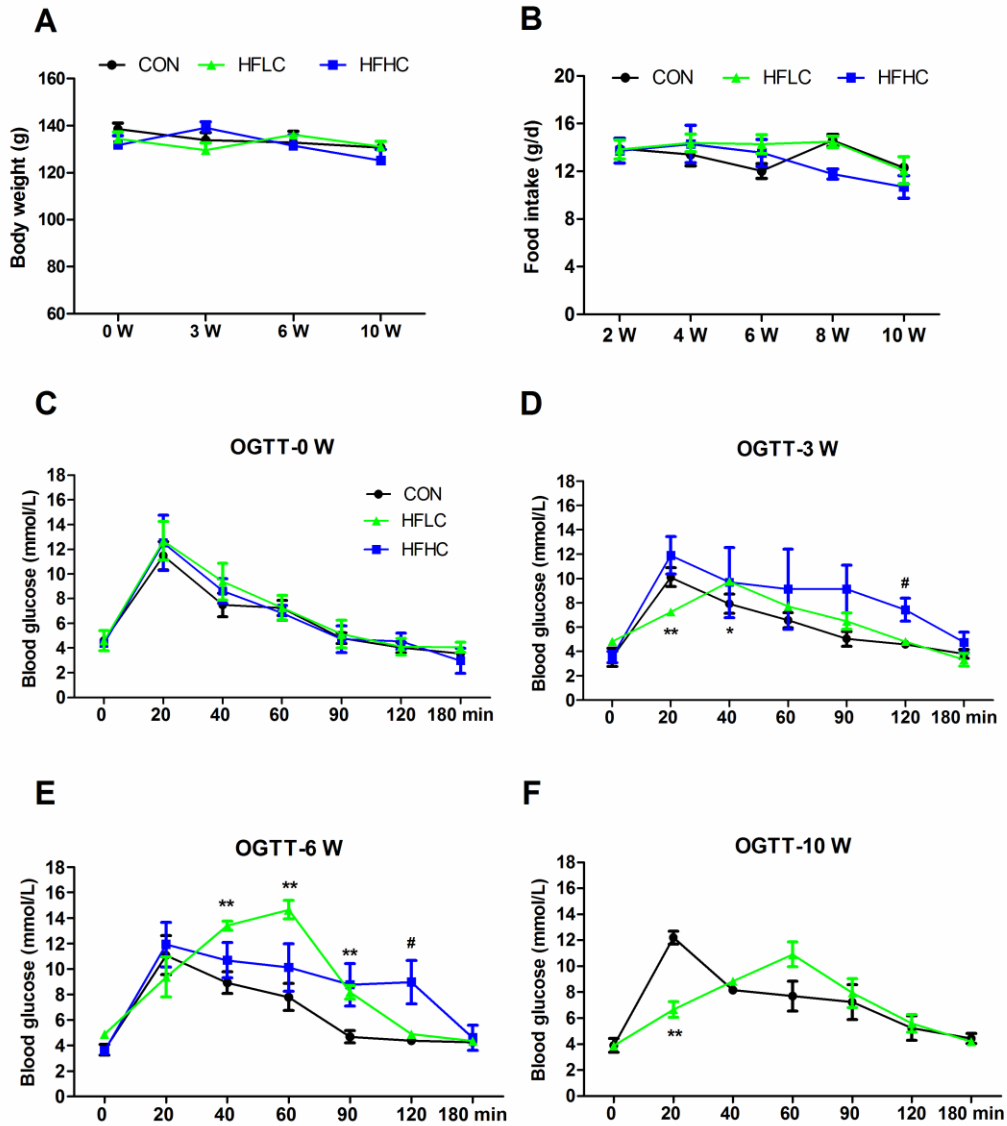

20

21 **Figure S1. Body weight, food intake and oral glucose tolerance test (OGTT) in**  
 22 **tree shrew.** Compared to control diet, both HFLC and HFHC diet did not change  
 23 body weight (A) and food intake (B). OGTT at 0 week (C) (n=4 for each group), 3  
 24 weeks (D) (n=4, 4, 5 for CON, HFLC and HFHC, respectively), 6 weeks (E) (n=4, 4,  
 25 3 for CON, HFLC and HFHC, respectively), and 10 week (F) (n=3, 3 for CON and  
 26 HFLC, respectively). Data were presented as mean  $\pm$  SEM. Significant difference  
 27 between two groups, \*: P<0.05, \*\*: P<0.01.

28

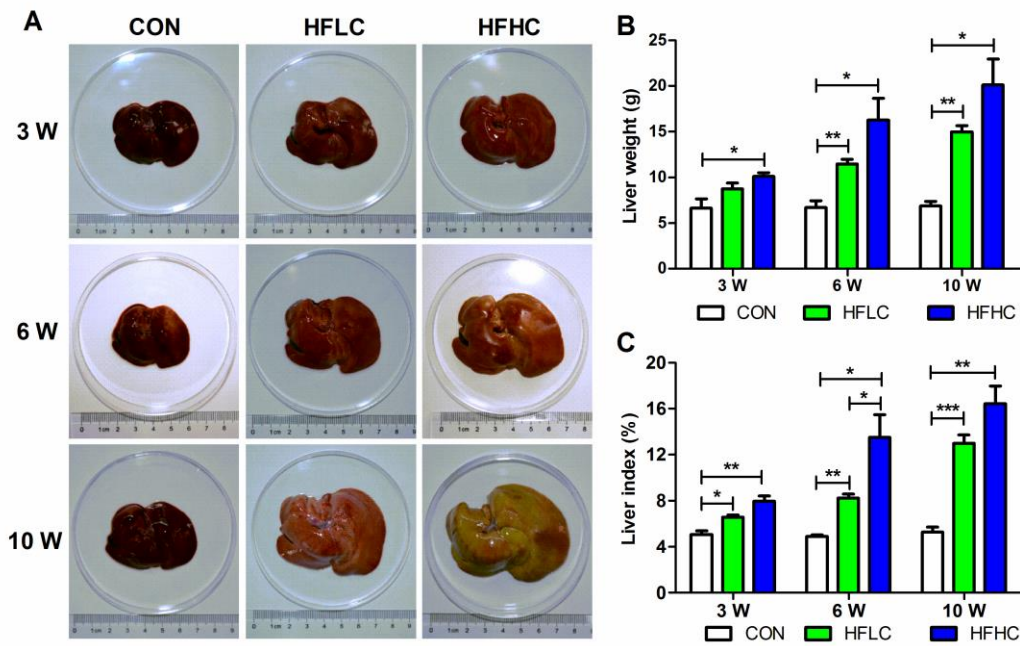

30

31 **Figure S2. Liver morphology, liver weight and liver index.** A: liver morphology of  
 32 represented animal. Liver weight (B) and liver index (C) were significantly increased  
 33 in a time-dependent manner in both HFLC and HFHC group compared to control  
 34 group (CON). Data were presented as mean  $\pm$  SEM of 3-4 animals. Significant  
 35 difference between two groups, \*:  $P < 0.05$ , \*\*:  $P < 0.01$ , \*\*\*:  $P < 0.001$ .

36

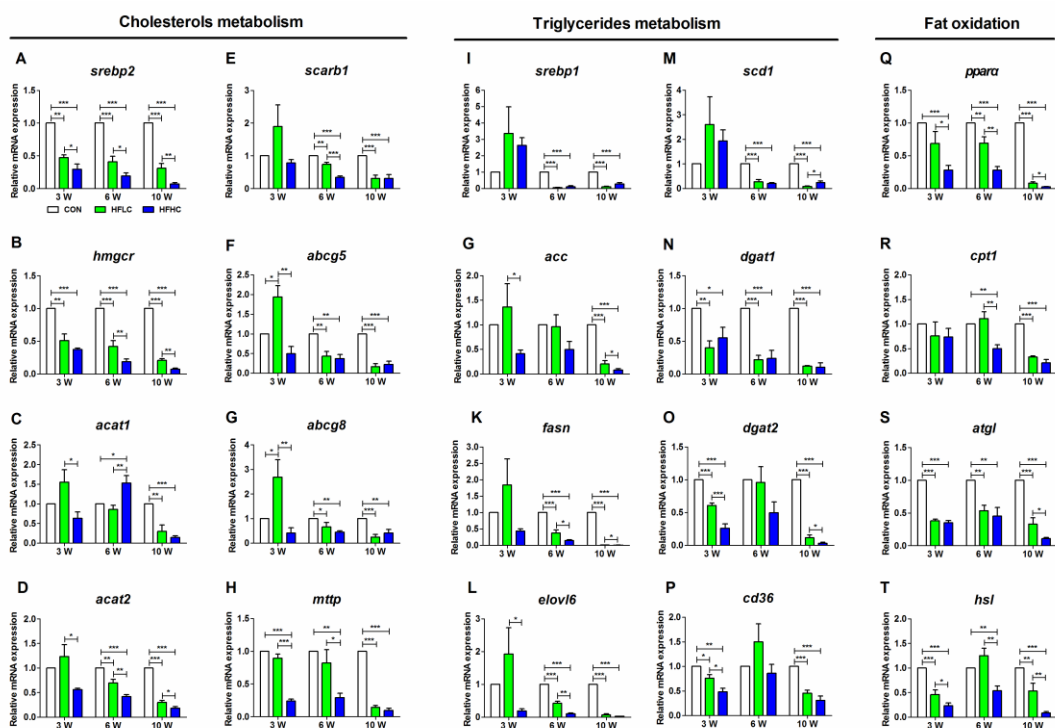

38

39 **Figure S3.** The mRNA expression of genes involved in cholesterol, triglycerides  
 40 metabolism and fat oxidation. A-H: Relative mRNA expression of *srebp2*, *hmgcr*,  
 41 *acat1*, *acat2*, *scarb1*, *abcg5*, *abcg8* and *mttp* involved in cholesterol metabolism. I-P:  
 42 Relative mRNA expression of *srebp1*, *acc*, *fas*, *elovl6*, *scd1*, *dgat1*, *dgat2* and *cd36*  
 43 involved in triglycerides metabolism. Q-T: Relative mRNA expression of *ppara*, *cpt1*,  
 44 *atgl* and *hsl* involved in fat oxidation. Data were presented as mean  $\pm$  SEM of  
 45 3-4 animals. Significant difference between two groups, \*:  $P < 0.05$ , \*\*:  $P < 0.01$ , \*\*\*:  
 46  $P < 0.001$ . **Abbreviations:** SREBP: Sterol regulatory element binding protein;  
 47 HMGCR: 3-hydroxy-3-methyl-glutaryl-CoA reductase; ACAT: Acyl-coenzyme A  
 48 cholesterol acyltransferase; SCARB: Scavenger receptor class B member; ABCG:  
 49 ATP-binding cassette sub-family G member; MTP: Microsomal triglyceride transfer  
 50 protein; ACC: Acetyl-CoA carboxylase; FASN: Fatty acid synthase; ELOVL6: Family  
 51 member 6, elongation of long-chain fatty acids; SCD: Stearoyl-CoA desaturase; DGAT:  
 52 Diacylglycerol acyltransferase; CD-36: Cluster differentiation protein-36, fatty acid  
 53 translocase; CPT-1: Carnitine palmitoyltransferase-1; ATGL: Adipose triacylglycerol  
 54 lipase; HSL: Hormone-sensitive lipase.

55

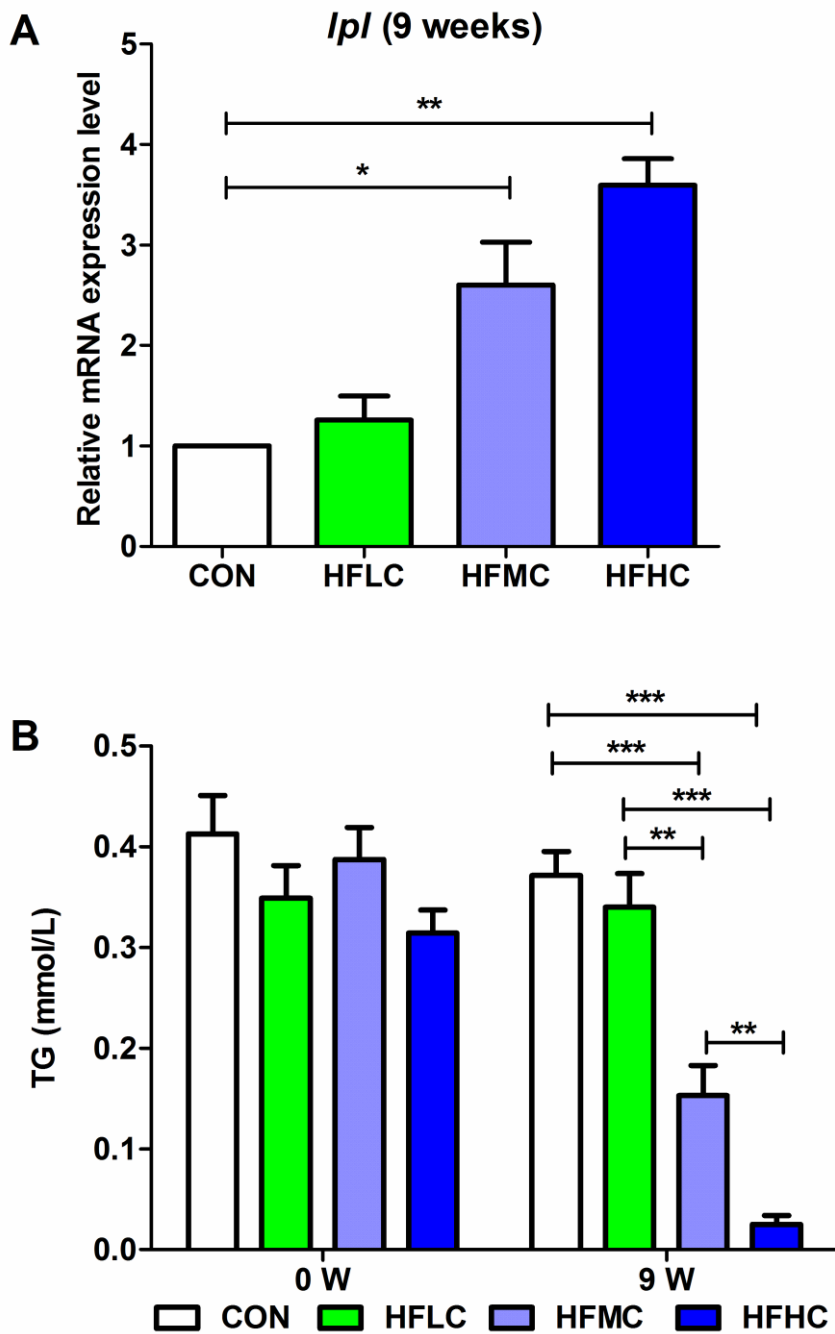

56

57 **Figure S4. The mRNA expression of *lpl* and plasma TG level.** A: The mRNA  
 58 expression of hepatic *lpl* among different diet groups at 9 weeks. HFMC: high fat  
 59 (20.2%), medium cholesterol (0.5%) diet (#D12107C). B: Plasma TG level in  
 60 different diet groups at 9 weeks. Data were presented as mean  $\pm$  SEM of 3-4 animals  
 61 for hepatic *lpl*, 6-8 animals for plasma TG, respectively. Significant difference  
 62 between two groups, \*\*:  $P < 0.01$ , \*\*\*:  $P < 0.001$ .

63

64 **Supplementary table**

65

|                 | CON        |              | HFHC       |                  | HFHC+P-407   |                     |
|-----------------|------------|--------------|------------|------------------|--------------|---------------------|
|                 | 0 W        | 3 W          | 0 W        | 3 W              | 0 W          | 3 W                 |
|                 | (n=6)      | (n=6)        | (n=5)      | (n=5)            | (n=6)        | (n=3)               |
| Body weight (g) | 136.0±2.6  | 137.8±2.7    | 131.0±3.1  | 123.9±6.0        | 130.0±5.1    | 120.2±7.4 b*        |
| AST(U/L)        | 177.8±45.6 | 133.0±19.4   | 113.2±35.5 | 304.6±42.6 a† d† | 145.7±32.3   | 55.3±43.8 c†        |
| ALT(U/L)        | 127.8±25.8 | 109.8±17.1   | 140.6±70.3 | 409.4±84.8 a† d* | 124.7±38.4   | 45.33±2.4 c†        |
| TC(mmol/L)      | 2.03±0.14  | 1.71±0.09    | 2.03±0.09  | 7.80±0.51 a† d†  | 2.01±0.17    | 31.15±0.47 b† c† d† |
| TG(mmol/L)      | 0.44±0.02  | 0.47±0.04    | 0.45±0.03  | 0.28±0.04 a* d*  | 0.40±0.05    | 4.20±0.70 b* c* d*  |
| HDL-c(mmol/L)   | 1.21±0.10  | 0.98±0.09    | 1.18±0.07  | 2.78±0.17 a† d†  | 1.23±0.10    | 6.48±2.82 b† c* d*  |
| LDL-c(mmol/L)   | 0.22±0.05  | 0.28±0.03    | 0.17±0.02  | 2.29±0.43 a† d†  | 0.19±0.03    | 18.77±0.58 b† c† d† |
| FBG(mmol/L)     | 4.17±0.30  | 4.28±0.29    | 4.34±0.46  | 4.58±0.26        | 4.07±0.40    | 5.57±0.24 b* d*     |
| HbA1c(%)        | 4.65±0.08  | 4.06±0.19 d* | 4.58±0.06  | 4.54±0.07 a*     | 4.25±0.17 b† | 3.17±0.12 b† c† d†  |

66 **Table S1. Body weight, food intake, and blood biochemical parameters of tree shrew treated**  
67 **with P-407.** Data are presented as mean±SEM. a, b, c: indicated a significant difference of  
68 comparison between groups at same time point (\*P<0.05, †P<0.01). a: CON versus HFHC, b:  
69 CON versus HFHC+P-407, c: HFHC versus HFHC+P-407.d: indicated a significant difference of  
70 comparison in same diet group at different time point (\*P<0.05, †P<0.01). d: 0 W versus 3 W.

71
